# Supplementary material for: Single-celled bioturbators: benthic foraminifera mediate oxygen penetration and prokaryotic diversity in intertidal sediment
Source: Copernicus journal article supplement (doi:10.5194/egusphere-2023-705), 2023-04-17
Supplement: Supplementary file 1 [file egusphere-2023-705-supplement.pdf]

Supplementary Materials for

**Single-celled bioturbators: benthic foraminifera mediate oxygen penetration and prokaryotic diversity in intertidal sediment**

Dewi Langlet, Florian Mermillod-Blondin, Noémie Deldicq, Arthur Bauville, Gwendoline Duong, Lara Konecny, Mylène Hugoni, Lionel Denis and Vincent M.P. Bouchet

\*Corresponding author. Email: [dewi.langlet@oist.jp](mailto:dewi.langlet@oist.jp)

**This PDF file includes:**

Figs. S1 to S2

Tables S1 to S2

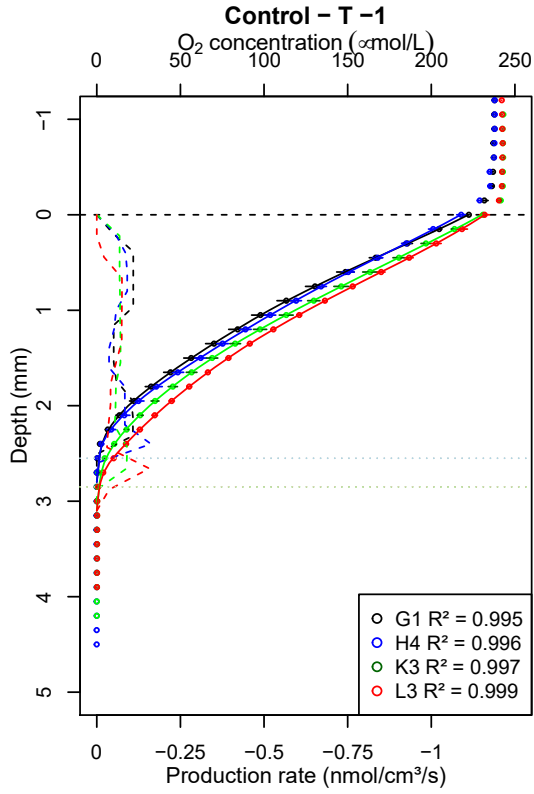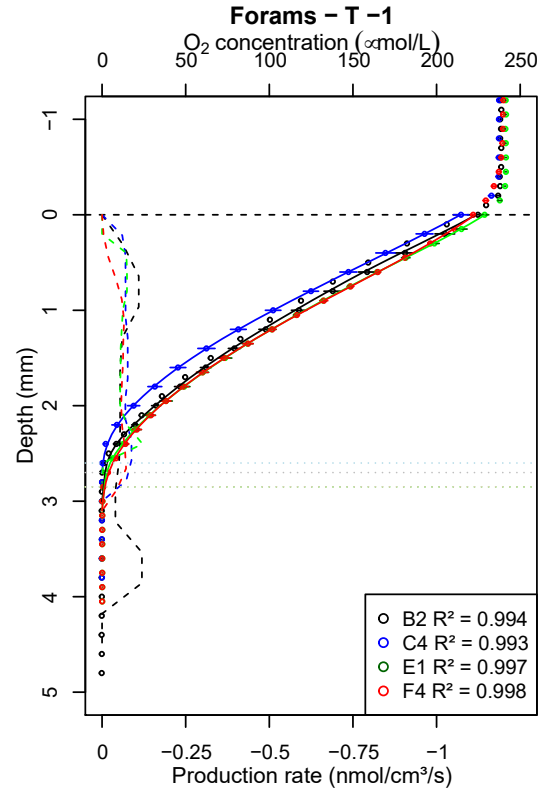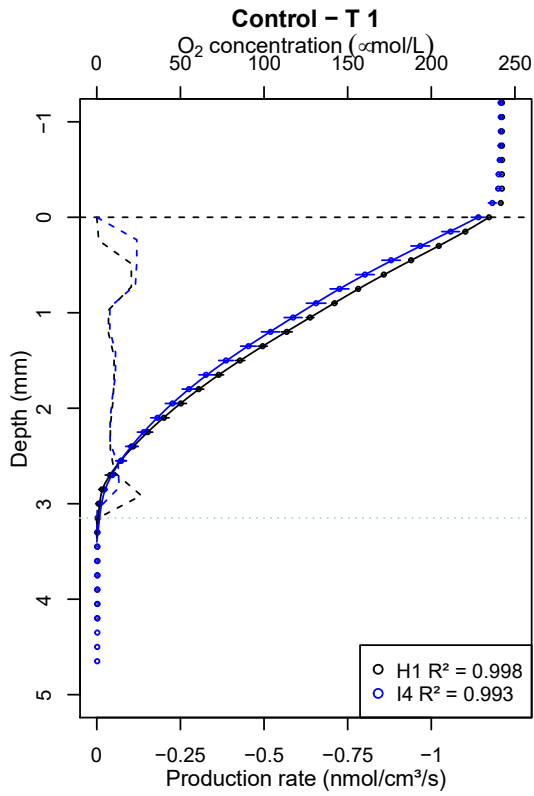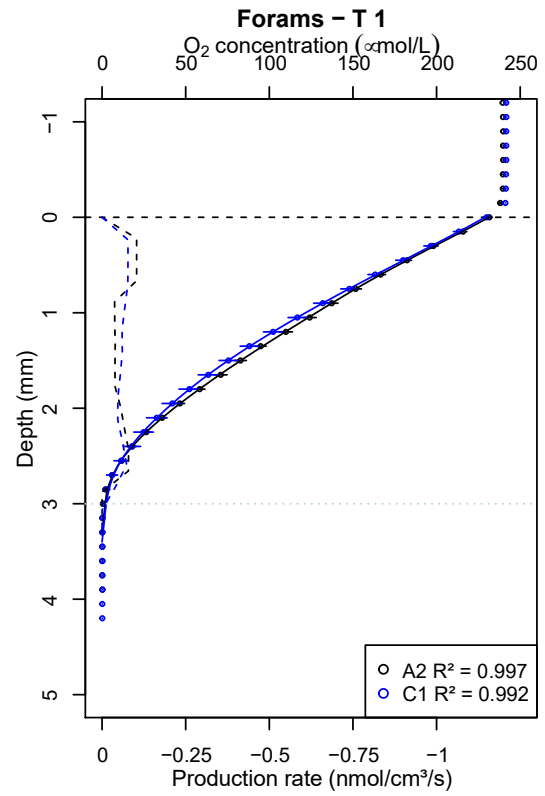

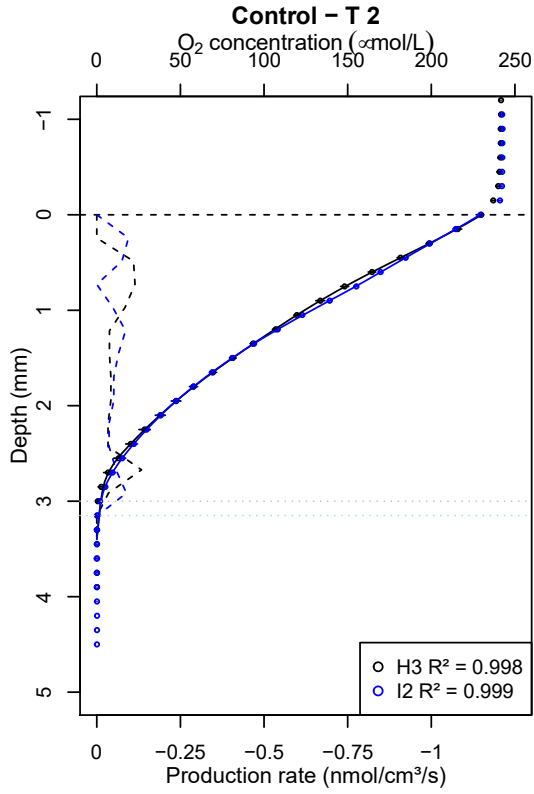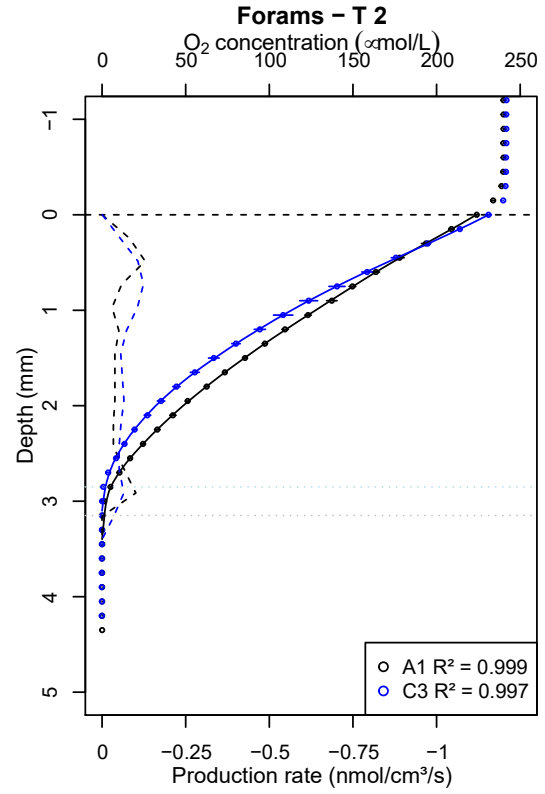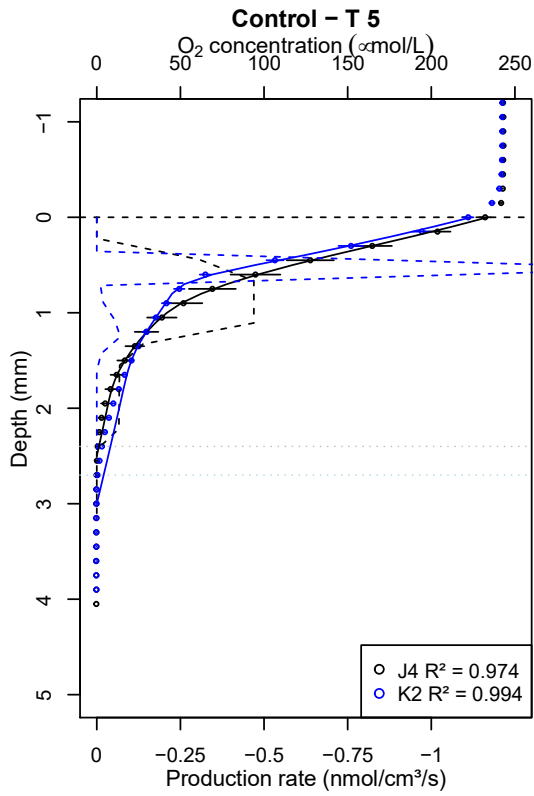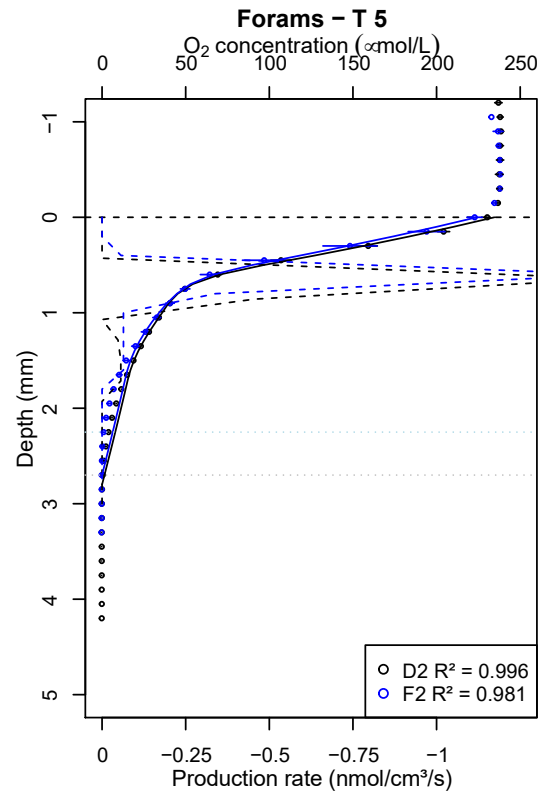

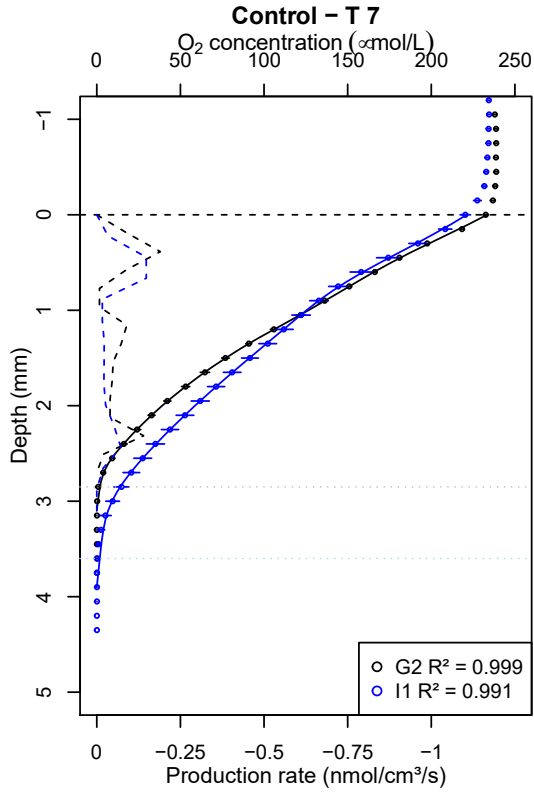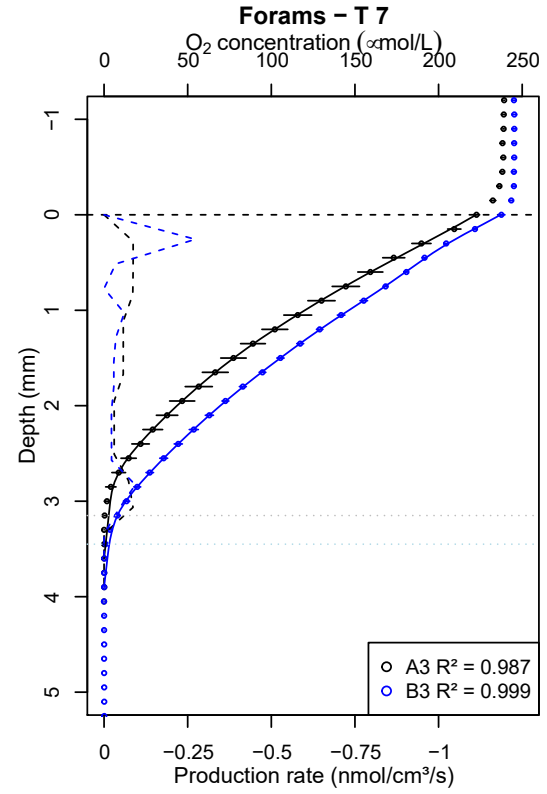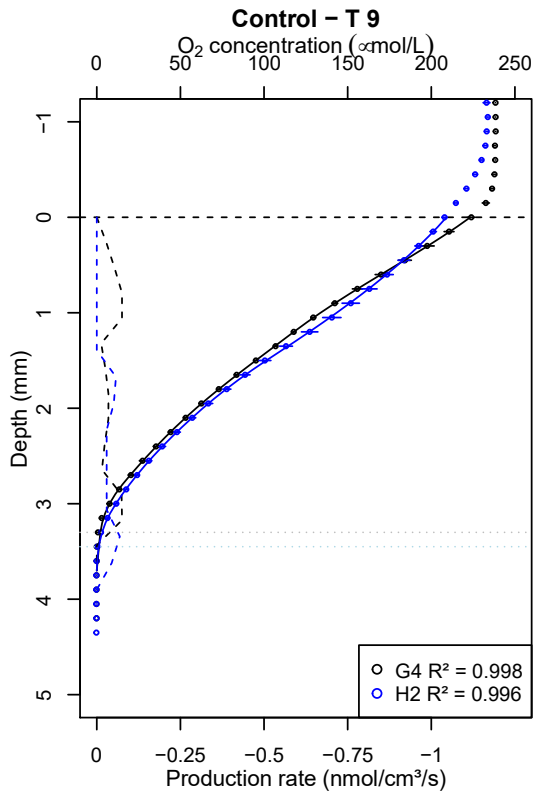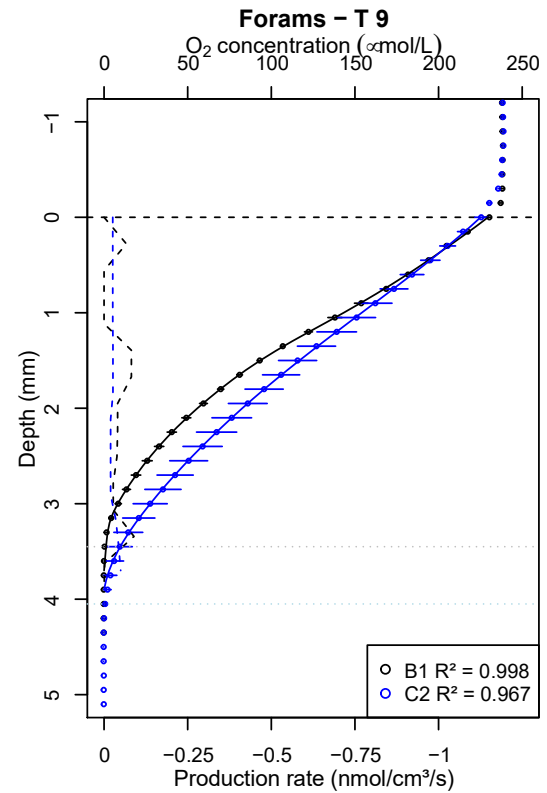

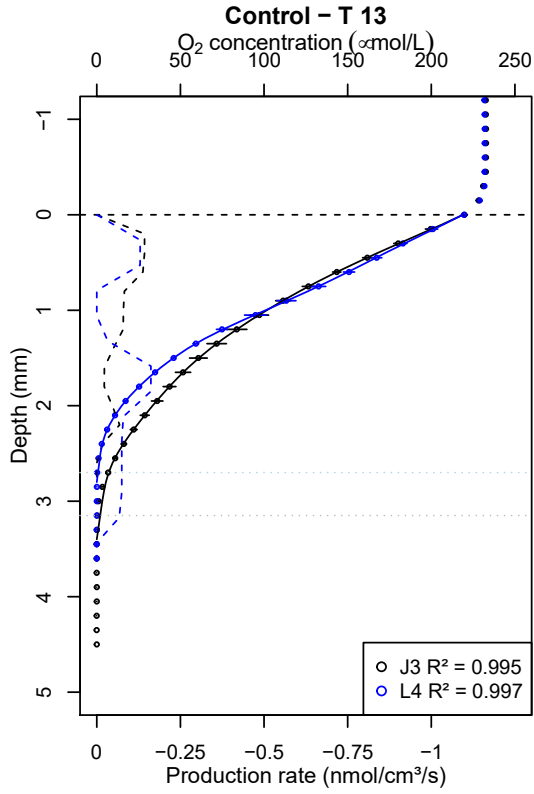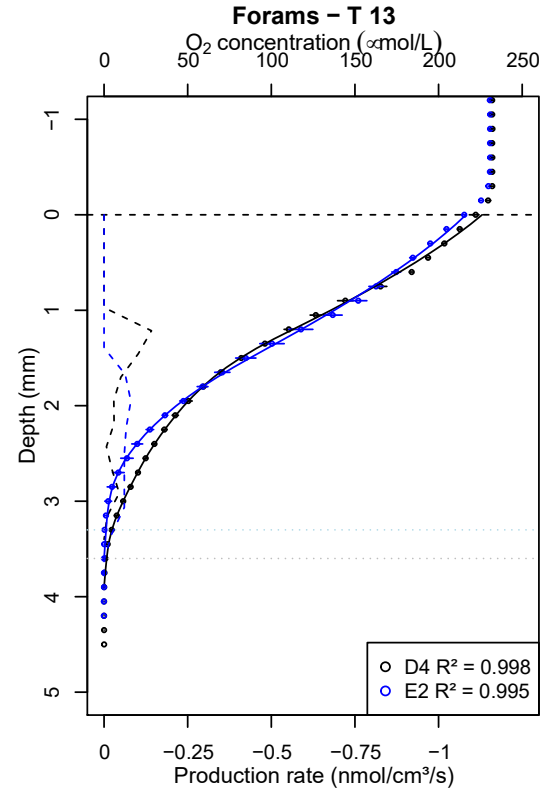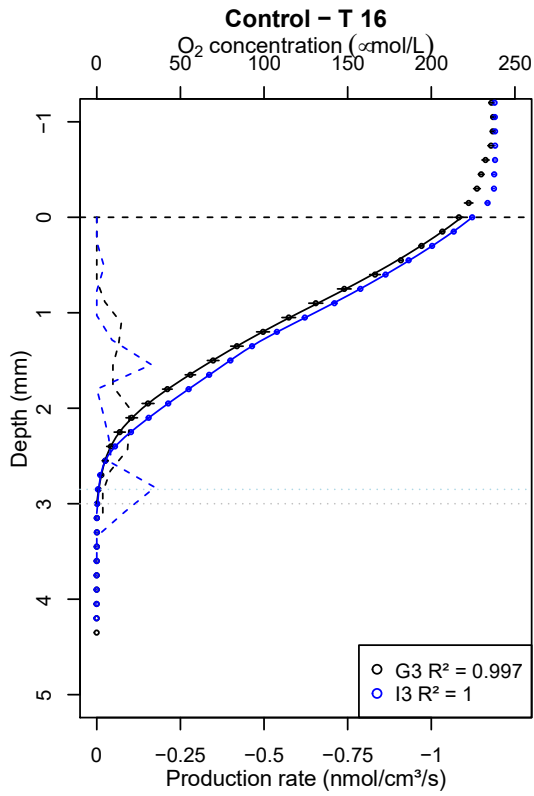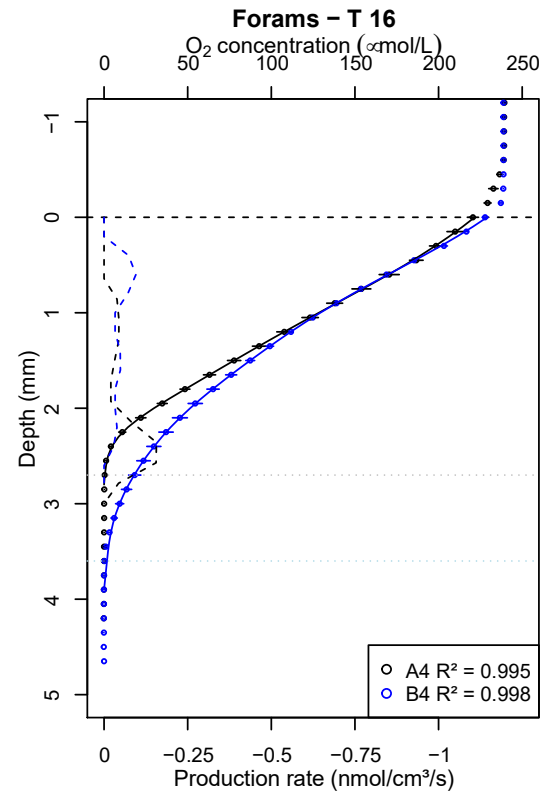

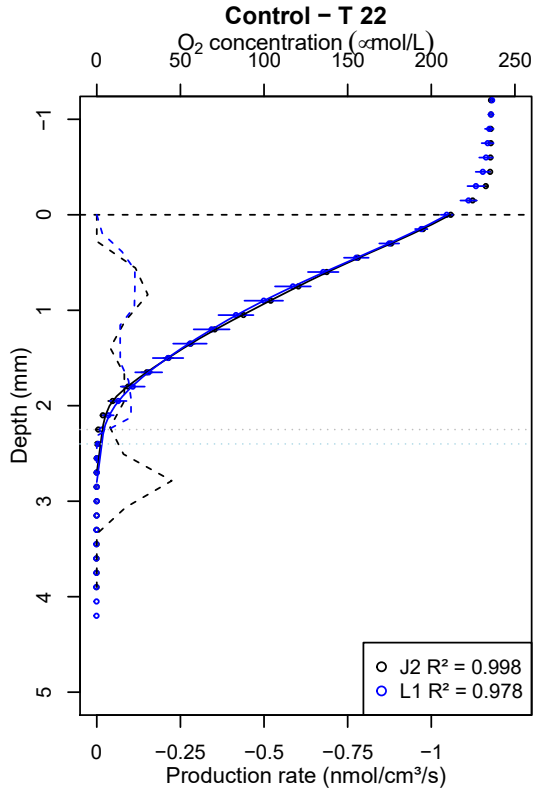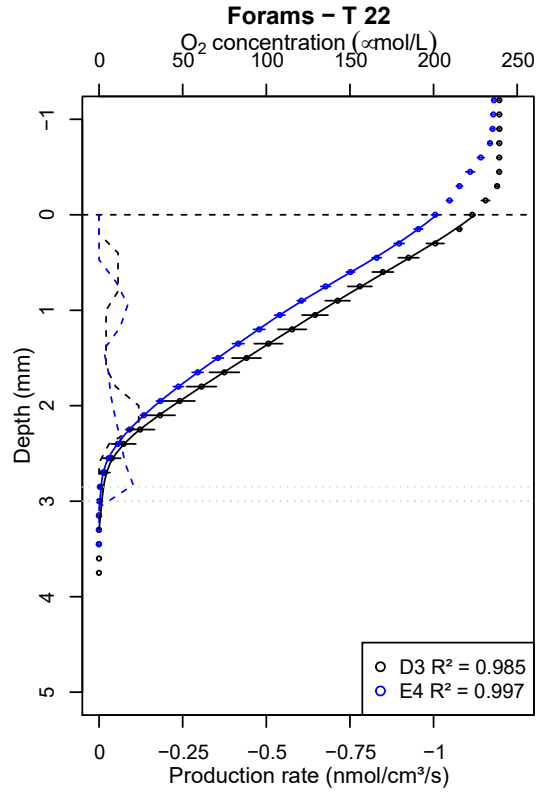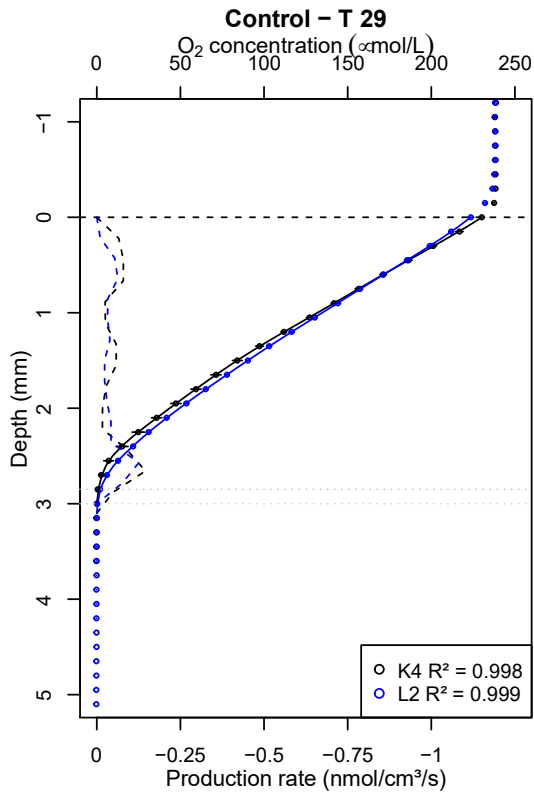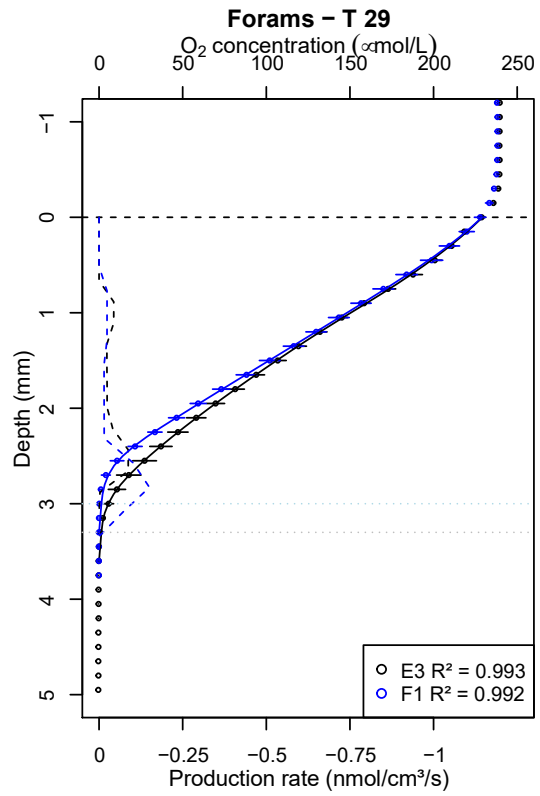

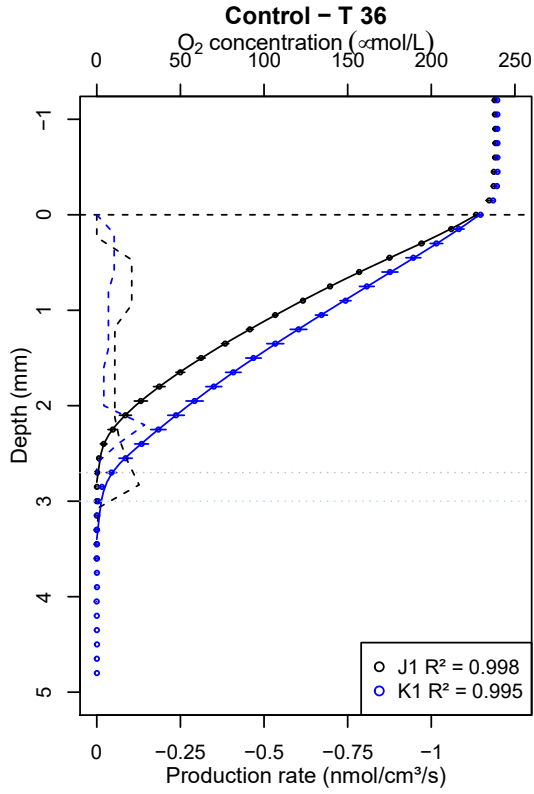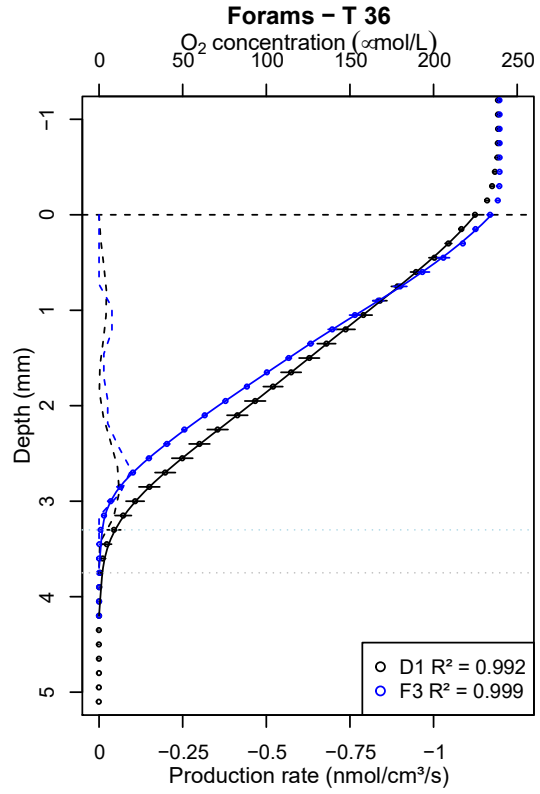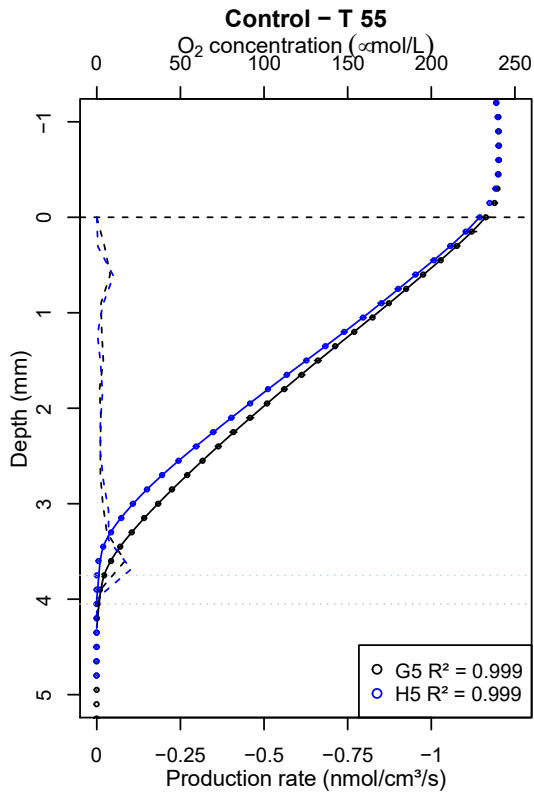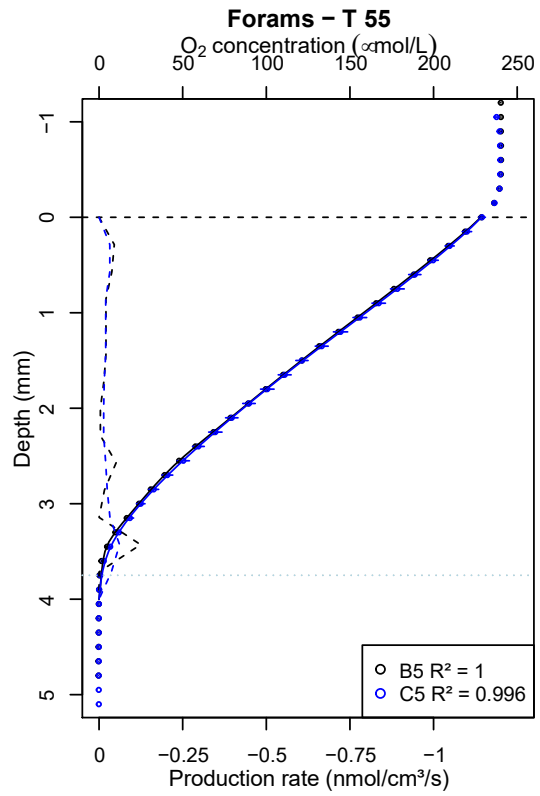

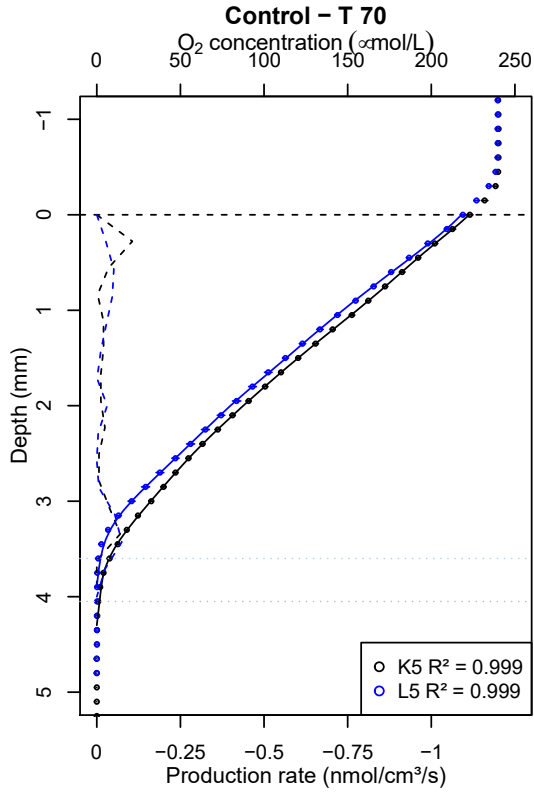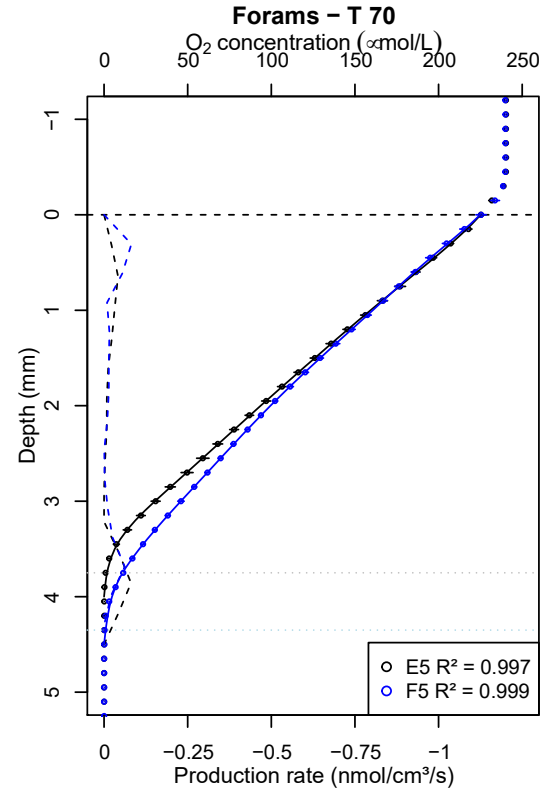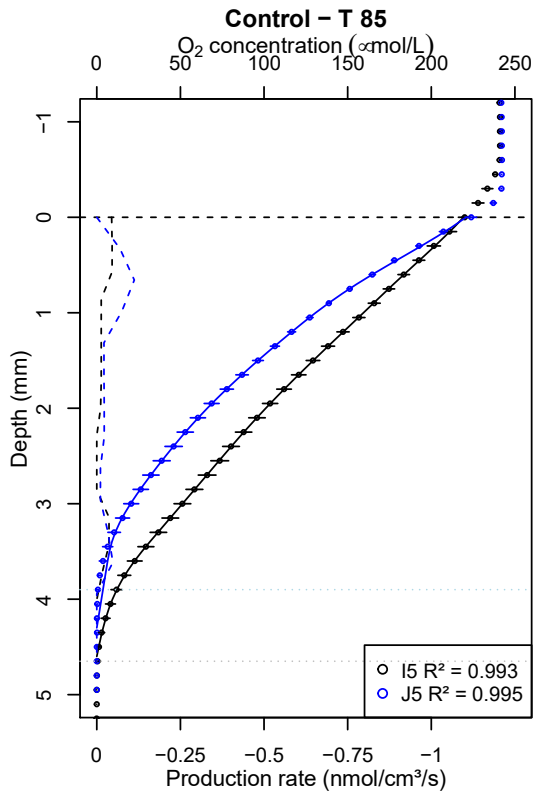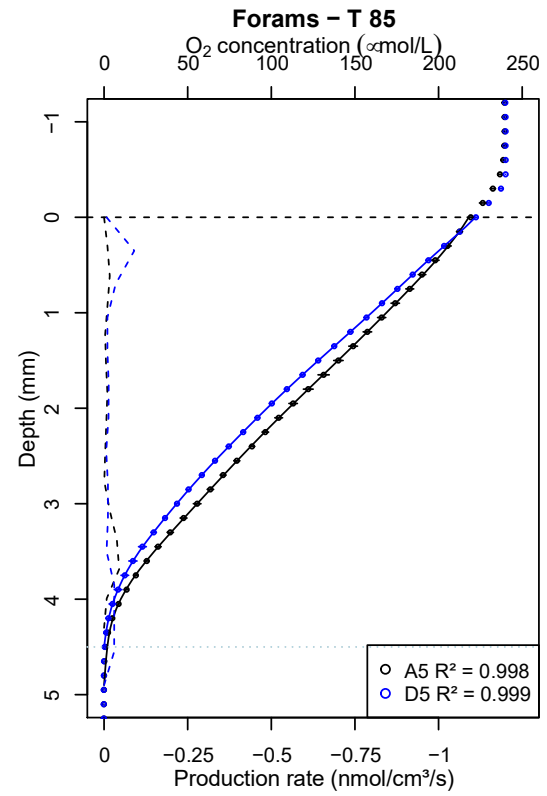



**Fig. S1. Oxygen profiles interpretation.** Average oxygen concentration distribution in the sediment +/- sem for all sampled zones in control (left panels) and in bioturbated cores (right panels) at all time. Full line shows the modeled vertical distribution of dissolved oxygen and dashed line represent the oxygen production rate at each depth interval. Profiles measured at T5 (J4, K2, D2 and F2) were not considered in the manuscript analysis due to the odd vertical distribution they exhibit.

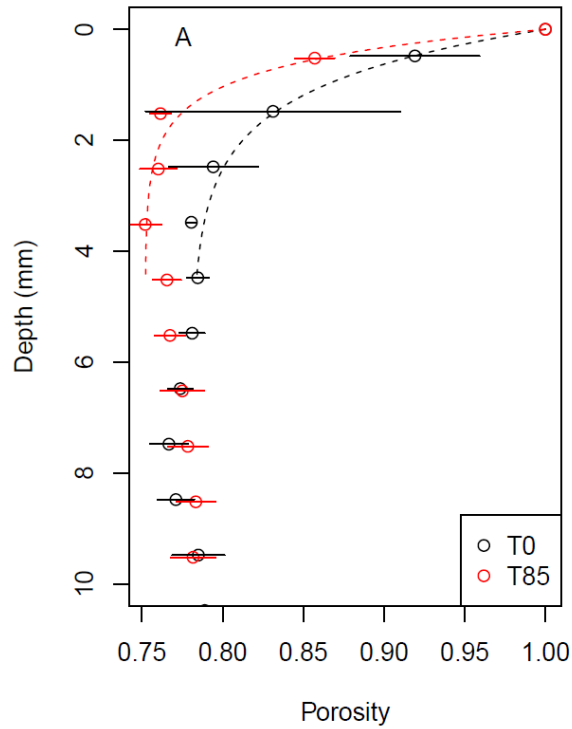

**Fig. S2. Sediment microporosity vertical profiles.** Porosity profiles in the sediment at the beginning (black) and the end of the experiment (red). For all profiles, open circles represent the average and the whiskers the standard deviation calculated on 4 replicates. Dashed lines are the modeled distribution per depth in the top 5 mm, such as porosity =  $0.78 + 0.22 \exp(-0.97 \times \text{depth})$  at the beginning of the experiment and porosity =  $0.75 + 0.25 \exp(-1.59 \times \text{depth})$  after 85 days of experiment.

Type or paste caption here. Create a page break and paste in the Figure above the caption.

**Table S1. Linear models parameters.** Linear mixed effects models parameters estimate in all dataset and for all response variables tested. Values significantly different from 0 ( $p < 0.05$ ) are shown as bold characters.

| Dataset      | Response variable        | Fixed effect variable | Value                        | Std.Error                   | DF         | t-value     | p-value          |
|--------------|--------------------------|-----------------------|------------------------------|-----------------------------|------------|-------------|------------------|
| 0 - 35 days  | Oxygen penetration depth | Intercept             | <b>2887.6</b>                | <b>83.4</b>                 | <b>118</b> | <b>34.6</b> | <b>&lt;.0001</b> |
|              |                          | Time                  | -1.1                         | 3.8                         | 118        | -0.3        | 0.76             |
|              |                          | Treatment             | 68.1                         | 117.9                       | 10         | 0.6         | 0.58             |
|              |                          | Time * Treatment      | <b>12.5</b>                  | <b>5.4</b>                  | <b>118</b> | <b>2.3</b>  | <b>0.02</b>      |
|              | Diffusive oxygen uptake  | Intercept             | <b>24.63 10<sup>-3</sup></b> | <b>1.47 10<sup>-3</sup></b> | <b>30</b>  | <b>16.8</b> | <b>&lt;.0001</b> |
|              |                          | Time                  | -0.04 10 <sup>-3</sup>       | 0.09 10 <sup>-3</sup>       | 30         | -0.5        | 0.64             |
|              |                          | Treatment             | -0.37 10 <sup>-3</sup>       | 2.07 10 <sup>-3</sup>       | 10         | -0.2        | 0.86             |
|              |                          | Time * Treatment      | <b>-0.35 10<sup>-3</sup></b> | <b>0.12 10<sup>-3</sup></b> | <b>30</b>  | <b>-2.9</b> | <b>0.01</b>      |
| 55 - 85 days | Oxygen penetration depth | Intercept             | <b>3291.7</b>                | <b>83.4</b>                 | <b>24</b>  | <b>5.0</b>  | <b>&lt;.0001</b> |
|              |                          | Time                  | 10.0                         | 3.8                         | 8          | 1.1         | 0.31             |
|              |                          | Treatment             | -825.0                       | 117.9                       | 8          | -0.9        | 0.40             |
|              |                          | Time * Treatment      | 13.3                         | 5.4                         | 8          | 1.0         | 0.34             |
|              | Diffusive oxygen uptake  | Intercept             | 6.31 10 <sup>-3</sup>        | 4.02 10 <sup>-3</sup>       | 8          | 1.6         | 0.16             |
|              |                          | Time                  | 0.07 10 <sup>-3</sup>        | 0.06 10 <sup>-3</sup>       | 8          | 1.2         | 0.27             |
|              |                          | Treatment             | 11.62 10 <sup>-3</sup>       | 5.68 10 <sup>-3</sup>       | 8          | 2.0         | 0.08             |
|              |                          | Time * Treatment      | -0.18 10 <sup>-3</sup>       | 0.08 10 <sup>-3</sup>       | 8          | -2.3        | 0.05             |

**Table S2. Sampling plan.** Detailed sampling plan with zones randomly selected for microprofiling at each sampling time, for each zone the letter corresponds to the identification of a core and the digit to the sampling zone (see Figure 6B).

| Time (days) | Bioturbated zones | Control zones |
|-------------|-------------------|---------------|
| -1          | B2 C4 F4 E1       | G1 H4 K3 L3   |
| 1           | A2 C1             | I4 H1         |
| 2           | A1 C3             | H3 I2         |
| 5           | D2 F2             | J4 K2         |
| 7           | A3 B3             | G2 I1         |
| 9           | C2 B1             | H2 G4         |
| 13          | D4 E2             | L4 J3         |
| 16          | A4 B4             | I3 G3         |
| 22          | D3 E4             | J2 L1         |
| 29          | E3 F1             | K4 L2         |
| 36          | F3 D1             | J1 K1         |
| 55          | C5 B5             | G5 H5         |
| 70          | F5 E5             | L5 K5         |
| 85          | A5 D5             | J5 I5         |
